# Supplementary material for: CoCoNUT: an efficient system for the comparison and analysis of genomes
Source: PubMed Central journal article supplement (PMC3224568; doi:10.1186/1471-2105-9-476), 2008-11-12
Supplement: 1471-2105-9-476-S1.pdf [file 1471-2105-9-476-S1.pdf]

## Additional File 1

### The coordinates of the regions of high similarity and the synteny blocks

Tables 1 and 2 contain the coordinates of syntenic regions and synteny blocks of the (unmasked) X-chromosomes of human, mouse, and rat , respectively.

**Table 1: Syntenic regions of the (unmasked) X-chromosomes of human, mouse, and rat.**

| Strands | Human   |                     | Mouse   |                     | Rat     |                     |
|---------|---------|---------------------|---------|---------------------|---------|---------------------|
|         | $L_h$   | start, end          | $L_m$   | start, end          | $L_r$   | start, end          |
| +++     | 467886  | 9179897,9647783     | 306667  | 74601660,74908327   | 330306  | 63062225,63392531   |
| ++-     | 7664681 | 10397756,18062437   | 8577044 | 157846009,166423053 | 9378792 | 44776455,54155247   |
| ++-     | 4432675 | 18170131,22602806   | 4683907 | 153009563,157693470 | 5148650 | 54799697,59948347   |
| ++-     | 763034  | 22951211,23714245   | 914924  | 151647683,152562607 | 1105377 | 60532870,61638247   |
| ---     | 2384569 | 23761438,26146007   | 2337120 | 89325266,91662386   | 2705871 | 79183634,81889505   |
| ---     | 1729557 | 26365545,28095102   | 2166835 | 86056279,88223114   | 2487414 | 76332109,78819523   |
| ---     | 5351854 | 28282039,33633893   | 6110642 | 79590728,85701370   | 6962713 | 68802619,75765332   |
| +-      | 4702556 | 37778101,42480657   | 5151951 | 9462801,14614752    | 5382332 | 19651677,25034009   |
| +-      | 3965312 | 43386232,47351544   | 4304047 | 16182664,20486711   | 5240844 | 12512239,17753083   |
| +-      | 1986585 | 48205065,50191650   | 1408850 | 6445357,7854207     | 1510003 | 26247496,27757499   |
| +-      | 900113  | 50356432,51256545   | 586420  | 5624416,6210836     | 651933  | 28682370,29334303   |
| +-      | 1962455 | 53094295,55056750   | 1802581 | 147001098,148803679 | 2062863 | 39806481,41869344   |
| +-      | 1012414 | 55760911,56773325   | 584556  | 149574495,150159051 | 658014  | 37726641,38384655   |
| +++     | 875376  | 62486692,63362068   | 446035  | 92220802,92666837   | 450520  | 82564598,83015118   |
| +++     | 1526461 | 64055659,65582120   | 1077704 | 92837515,93915219   | 1070298 | 83221410,84291708   |
| +++     | 6888334 | 65933885,72822219   | 5887123 | 94702799,100589922  | 6143838 | 85220128,91363966   |
| +++     | 1304692 | 73354932,74659624   | 1097929 | 100768249,101866178 | 1136879 | 91563406,92700285   |
| +++     | 4274545 | 75311154,79585699   | 2789920 | 102276737,105066657 | 2965532 | 93154013,96119545   |
| +++     | 605608  | 79813700,80419308   | 412001  | 105933422,106345423 | 538581  | 97004802,97543383   |
| +++     | 2821142 | 80908133,83729275   | 2082860 | 106822494,108905354 | 2235463 | 98061015,100296478  |
| +++     | 2652542 | 84114886,86767428   | 2302683 | 109354090,111656773 | 2462592 | 100834259,103296851 |
| +++     | 320868  | 89217373,89538241   | 410663  | 115709122,116119785 | 409959  | 107912648,108322607 |
| +++     | 1620026 | 90141371,91761397   | 1300361 | 116720470,118020831 | 1524141 | 109034353,110558494 |
| +++     | 479329  | 92656677,93136006   | 661620  | 119248969,119910589 | 607508  | 112014099,112621607 |
| +++     | 6548268 | 94525627,101073895  | 6926806 | 124617187,131543993 | 7937683 | 114547610,122485293 |
| +++     | 3723370 | 103468047,107191417 | 3693930 | 133760226,137454156 | 4184395 | 124578908,128763303 |
| +-      | 5453627 | 107294914,112748541 | 5054520 | 137609562,142664082 | 5253171 | 32226081,37479252   |
| +-      | 824132  | 113550984,114375116 | 763542  | 143225317,143988859 | 1054149 | 30376153,31430302   |
| +-      | 1495766 | 115972091,117467857 | 1524204 | 21858778,23382982   | 1830904 | 9720301,11551205    |
| +-      | 1356359 | 117513501,118869860 | 1220719 | 33428526,34649245   | 1234991 | 7802748,9037739     |
| +-      | 544348  | 119271294,119815642 | 625355  | 35545389,36170744   | 644718  | 6523738,7168456     |
| +-      | 5451691 | 120251711,125703402 | 5575062 | 36756736,42331798   | 5888930 | 7561,5896491        |
| +++     | 663947  | 125919584,126583531 | 795718  | 42576547,43372265   | 1129929 | 131105514,132235443 |
| +++     | 3123613 | 127244138,130367751 | 3583760 | 43788329,47372089   | 3730479 | 132791653,136522132 |
| +++     | 3325165 | 130570799,133895964 | 2916095 | 47823573,50739668   | 3263314 | 137091673,140354987 |
| +++     | 5023878 | 134874203,139898081 | 4868963 | 53841699,58710662   | 5919941 | 141126905,147046846 |
| ---     | 437285  | 139947609,140384894 | 446857  | 58735343,59182200   | 393801  | 147069212,147463013 |
| +++     | 2848517 | 141198752,144047269 | 3069160 | 59868237,62937397   | 3330696 | 148264712,151595408 |
| +++     | 796409  | 144562993,145359402 | 829667  | 63714684,64544351   | 874457  | 152409707,153284164 |
| +++     | 1964449 | 146271337,148235786 | 2146514 | 65322909,67469423   | 2518355 | 154240620,156758975 |
| +++     | 653752  | 149789168,150442920 | 407696  | 68728267,69135963   | 305356  | 157023298,157328654 |
| +++     | 2040751 | 151108706,153149457 | 1698670 | 69690361,71389031   | 1703832 | 158405356,160109188 |

Syntenic regions of the (unmasked) X-chromosomes of human, mouse, and rat, obtained after the second chaining step. The first column contains the orientation of the syntenic regions. For example, “+-” means that the region is on the forward strand of the human and mouse X-chromosomes and on the reverse strand of the rat X-chromosome. The columns titled “ $L_h$ ”, “ $L_m$ ”, and “ $L_r$ ” show the lengths of the regions. The column titled “start,end” contains the start and end position (separated by a comma) of the respective region.

**Table 2: Syntenic blocks of the (unmasked) X-chromosomes of human, mouse, and rat.**

| Strands | Human    |                     | Mouse    |                     | Rat      |                     |
|---------|----------|---------------------|----------|---------------------|----------|---------------------|
|         | $L_h$    | start, end          | $L_m$    | start, end          | $L_r$    | start, end          |
| +++     | 467886   | 9179897,9647783     | 306667   | 74601660,74908327   | 330306   | 63062225,63392531   |
| ++-     | 13316489 | 10397756,23714245   | 14775370 | 151647683,166423053 | 16861792 | 44776455,61638247   |
| ---     | 9872455  | 23761438,33633893   | 12071658 | 79590728,91662386   | 13086886 | 68802619,81889505   |
| +-      | 9573443  | 37778101,47351544   | 11023910 | 9462801,20486711    | 12521770 | 12512239,25034009   |
| ++-     | 1986585  | 48205065,50191650   | 1408850  | 6445357,7854207     | 1510003  | 26247496,27757499   |
| ---     | 900113   | 50356432,51256545   | 586420   | 5624416,6210836     | 651933   | 28682370,29334303   |
| ---     | 1962455  | 53094295,55056750   | 1802581  | 147001098,148803679 | 2062863  | 39806481,41869344   |
| +-      | 1012414  | 55760911,56773325   | 584556   | 149574495,150159051 | 658014   | 37726641,38384655   |
| +++     | 44704725 | 62486692,107191417  | 45233354 | 92220802,137454156  | 46198705 | 82564598,128763303  |
| +-      | 7080202  | 107294914,114375116 | 6379297  | 137609562,143988859 | 7103099  | 30376153,37479252   |
| +-      | 9731311  | 115972091,125703402 | 20473020 | 21858778,42331798   | 11543644 | 7561,11551205       |
| +++     | 13978497 | 125919584,139898081 | 16134115 | 42576547,58710662   | 15941332 | 131105514,147046846 |
| ---     | 437285   | 139947609,140384894 | 446857   | 58735343,59182200   | 393801   | 147069212,147463013 |
| +++     | 11950705 | 141198752,153149457 | 11520794 | 59868237,71389031   | 11844476 | 148264712,160109188 |

Syntenic blocks of the (unmasked) X-chromosomes of human, mouse, and rat, obtained when using the corresponding option of CoCoNUT. The first column contains the orientation of the syntenic blocks. For example, “+-” means that the block is on the forward strand of the human and mouse X-chromosomes and on the reverse strand of the rat X-chromosome. The columns titled “ $L_h$ ”, “ $L_m$ ”, and “ $L_r$ ” show the lengths of the blocks. The column titled “start,end” contains the start and end position (separated by a comma) of the respective region.
